1 **Title:**

2 **Minimal lactazole scaffold for *in vitro* production of pseudo-natural thiopeptides**

3

4 **Authors**

5 Alexander A. Vinogradov<sup>1†</sup>, Morito Shimomura<sup>2†</sup>, Yuki Goto<sup>1,\*</sup>, Taro Ozaki<sup>2,&</sup>, Shumpei Asamizu<sup>2,3</sup>,  
6 Yoshinori Sugai<sup>2</sup>, Hiroaki Suga<sup>1,\*</sup>, and Hiroyasu Onaka<sup>2,3,\*</sup>

7

8 **Affiliations**

9 <sup>1</sup>Department of Chemistry, Graduate School of Science, The University of Tokyo, Bunkyo-ku, Tokyo  
10 113-0033, Japan

11 <sup>2</sup>Department of Biotechnology, Graduate School of Agricultural and Life Sciences, The University of  
12 Tokyo, Bunkyo-ku, Tokyo 113-8657, Japan

13 <sup>3</sup> Collaborative Research Institute for Innovative Microbiology, The University of Tokyo 1-1-1 Yayoi,  
14 Bunkyo-ku, Tokyo 113-8657, Japan

15

16 <sup>†</sup>These authors contributed equally to this work

17 \*Corresponding authors: Hiroyasu Onaka, Department of Biotechnology, The University of Tokyo,  
18 1-1-1 Yayoi, Bunkyo-ku, Tokyo 113-8657, Japan, +81-3-5841-1602, [aonaka@mail.ecc.u-tokyo.ac.jp](mailto:aonaka@mail.ecc.u-tokyo.ac.jp);  
19 Hiroaki Suga, Department of Chemistry, Graduate School of Science, The University of Tokyo,  
20 Bunkyo-ku, Tokyo 113-0033, Japan, +81-3-5841-8372, [hsuga@chem.s.u-tokyo.ac.jp](mailto:hsuga@chem.s.u-tokyo.ac.jp); Yuki Goto,  
21 Department of Chemistry, Graduate School of Science, The University of Tokyo, Bunkyo-ku, Tokyo  
22 113-0033, Japan, +81-3-5841-4338, [y-goto@chem.s.u-tokyo.ac.jp](mailto:y-goto@chem.s.u-tokyo.ac.jp)

23 <sup>&</sup>Present address: Department of Chemistry, Graduate School of Science, Hokkaido University, Sapporo,  
24 Hokkaido, 060-0810, Japan

25

26 **Abstract**

27 Lactazole A is a cryptic thiopeptide from *Streptomyces lactacystinaeus*, encoded by a compact 9.8 kb  
28 biosynthetic gene cluster. Here, we established a platform for *in vitro* biosynthesis of lactazole A,  
29 referred to as the FIT-Laz system, via a combination of the flexible *in vitro* translation (FIT) system  
30 with recombinantly produced lactazole biosynthetic enzymes. Systematic dissection of lactazole  
31 biosynthesis revealed remarkable substrate tolerance of the biosynthetic enzymes, and led to the  
32 development of the “minimal lactazole scaffold”, a construct requiring only 6 post-translational  
33 modifications for macrocyclization. Efficient assembly of such minimal thiopeptides with FIT-Laz  
34 enabled access to diverse lactazole analogs with 10 consecutive mutations, 14- to 62-membered  
35 macrocycles, and up to 18 amino acid-long tail regions. Moreover, utilizing genetic code  
36 reprogramming, we demonstrated synthesis of pseudo-natural lactazoles containing 4 non-  
37 proteinogenic amino acids. This work opens possibilities in exploring novel sequence space of pseudo-  
38 natural thiopeptides.

39

## 40 Introduction

41 Thiopeptides are natural products defined by a six-membered nitrogenous heterocycle, usually  
42 pyridine, grafted within the backbone of a peptidic macrocycle.<sup>1</sup> Multipleazole rings, dehydroamino  
43 acids, and other optional nonproteinogenic elements further contribute to the resulting structural  
44 complexity characteristic of thiopeptides. More than a hundred thiopeptides isolated to date are defined  
45 by strong antibiotic activity against Gram-positive bacteria, including methicillin resistant  
46 *Staphylococcus aureus* (MRSA).<sup>1-3</sup> For instance, thiostrepton has been used as a topical antibiotic in  
47 veterinary medicine, and LFF571, a synthetic derivative of naturally occurring GE2270A, underwent  
48 clinical trials as a treatment against *Clostridium difficile* infections.<sup>4</sup>

49 A decade ago, thiopeptides were shown to be of ribosomal origin.<sup>5-8</sup> During biosynthesis, a structural  
50 gene encoding a thiopeptide precursor is transcribed and translated, and the resulting peptide undergoes  
51 post-translational modifications (PTMs) introduced by cognate enzymes colocalized with the structural  
52 gene in a biosynthetic gene cluster (BGC). Commonly, these enzymes utilize the N-terminal leader  
53 peptide (LP) region of the precursor as a recognition sequence, and act on the core peptide (CP) to  
54 introduce PTMs such asazole and dehydroalanine (Dha). Eventually, a pyridine synthase catalyzes  
55 formation of a six-membered heterocycle in the CP and eliminates the LP, yielding a macrocyclic  
56 thiopeptide. Thus, thiopeptides represent a group of ribosomally synthesized and post-translationally  
57 modified peptide (RiPP) natural products.<sup>9</sup>

58 RiPP biosynthetic logic is highly conducive to bioengineering.<sup>10,11</sup> Simple nucleotide substitutions  
59 in the structural gene yield novel compounds, provided that these mutations are tolerated by the  
60 biosynthetic machinery. For BGCs encoding promiscuous enzymes, e.g. lanthipeptides and  
61 cyanobactins, this strategy can be applied to construct combinatorial libraries of natural product analogs.  
62 Recent studies demonstrated that such libraries can be screened to improve or completely reprogram  
63 antibacterial activities of the underlying RiPPs.<sup>12-19</sup>

64 In contrast, thiopeptide bioengineering proved to be significantly more challenging. Single-point  
65 mutagenesis studies<sup>20-24</sup> and a few complementary reports (e.g., BGC minimization,<sup>25</sup> and an  
66 incorporation of a single non-proteinogenic amino acid (npAA) suitable for bioconjugation)<sup>26</sup> represent  
67 the bulk of the work on this topic. The challenges in thiopeptide bioengineering can be attributed to a  
68 highly cooperative yet only partially understood biosynthesis process. For many thiopeptides, the roles  
69 of individual biosynthetic enzymes are only beginning to be elucidated.<sup>27-31</sup> Chemoenzymatic and  
70 semisynthetic approaches<sup>32-38</sup> may circumvent the limitations imposed by biosynthetic machinery, but  
71 due to the structural complexity of thiopeptides, these strategies present a number of challenges of their  
72 own.

73 We previously reported isolation and characterization of lactazole A, a cryptic thiopeptide from  
74 *Streptomyces lactacystinaeus* (Fig. 1a).<sup>39</sup> It is biosynthesized from a compact 9.8 kb *laz* BGC encoding  
75 just five enzymes essential for the macrocycle formation (Fig. 1b). Lactazole A has a low Cys/Ser/Thr  
76 content, a 32-membered macrocycle, and bears an unmodified amino acid in position 2 (Trp2), all of  
77 which are unusual features among thiopeptides (Fig. 1c).<sup>40</sup> Moreover, lactazole A shows no antibacterial

78 activity, and its primary biological function remains unknown. Recent bioinformatic studies indicated  
79 that the lactazole-like thiopeptides, characterized by an unmodified amino acid in position 2, comprise  
80 close to half of all predicted thiopeptides (251 out of 508 annotated BGCs), and yet the prototypical *laz*  
81 BGC remains the only characterized member of this family to date.<sup>41</sup> Overall, lactazole-like thiopeptides  
82 remain a rather enigmatic family of natural products, as close to nothing is known about their function,  
83 structural diversity, and biosynthesis.

84 Intrigued by the uniqueness of *laz* BGC, we set out to reconstitute *in vitro* biosynthesis of lactazole A.  
85 We sought to establish rapid and reliable access to lactazole A and its analogs in order to evaluate the  
86 applicability of *laz* BGC for bioengineering, and to pave the way for future characterization of enzymes  
87 and BGCs from the lactazole family. To this end, we report construction of the FIT-Laz system, a  
88 combination of flexible *in vitro* translation (FIT)<sup>42</sup> with PTM enzymes from *laz* BGC, as a platform for  
89 facile *in vitro* synthesis of lactazole-like thiopeptides (**Fig. 1d**). Taking advantage of the FIT-Laz system,  
90 we explored the substrate plasticity of *laz* BGC, and found that *in vitro* lactazole biosynthesis is  
91 remarkably tolerant to mutation, insertion and deletion of multiple amino acids, including npAAs. A  
92 systematic dissection of the pathway led to the identification of the “minimal lactazole scaffold”, a CP  
93 with only 5 amino acids indispensable for the macrocyclization process. Our work opens a possibility  
94 to tap into an unexplored sequence space of pseudo-natural thiopeptides, and use them as molecular  
95 scaffolds in drug lead discovery against protein targets of choice.

## 96 **Results**

### 97 ***In vitro* reconstitution of lactazole biosynthesis**

98 We began with recombinant production of Laz enzymes in *Escherichia coli* BL21(DE3). The five  
99 enzymes (LazB, LazC, LazD, LazE, and LazF) were expressed and purified as soluble His-tagged  
100 proteins (**Fig. S1**). The FIT system was used to establish access to the precursor peptide (LazA;<sup>43</sup> **Fig.**  
101 **2a**). Linear DNA template encoding LazA was assembled by PCR and incubated with the *in vitro*  
102 reconstituted translation machinery from *E. coli* supplemented with T7 RNA polymerase. This scheme  
103 for precursor peptide production parallels the previously established FIT-PatD and FIT-GS systems,  
104 used for the synthesis of azoline-containing peptides<sup>44</sup> and goadsporin analogs<sup>45</sup>, respectively.

105 With all components in hand, we turned to reconstitution of lactazole biosynthesis. Maturation of  
106 goadsporin, a distantly related linear azole-containing RiPP, is initiated with the formation of azoles,  
107 while Dha installation is dependent on it,<sup>46</sup> and biosynthesis of thiomuracin also follows a similar  
108 modification order.<sup>47</sup> Based on these results, we hypothesized that azole formation is the starting point  
109 in lactazole biosynthesis, and therefore attempted to reconstitute the activity of LazDEF (LazD, LazE  
110 and LazF) first. LazDE is a split YcaO cyclodehydratase<sup>40,48</sup> characteristic of thiopeptide BGCs: LazD  
111 is predicted to bear a RiPPs recognition element, necessary for LP binding,<sup>49</sup> and LazE contains an  
112 ATP-binding domain,<sup>50</sup> utilized for ATP-dependent cyclodehydration of Cys/Ser residues in the CP (**Fig.**  
113 **1d**). LazF is an unusual bifunctional protein that features a fusion between an FMN-dependent  
114 dehydrogenase which oxidizes azolines installed by LazDE to azoles,<sup>51-53</sup> and a glutamate elimination  
115 domain, tentatively participating in the formation of Dha (see below). After LazA precursor peptide

116 expressed with the FIT system (**Fig. 2b**) was incubated with LazDE, the mixture was treated with  
117 iodoacetamide (IAA) and analyzed by LC-MS. The resulting broad-range extracted ion chromatogram  
118 (<sup>br</sup>EIC; see S.I. 2.10 and **Fig. S2–S5** for detailed description of <sup>br</sup>EIC) indicated that the LazDE reaction  
119 yielded a mixture of two, three, four and five dehydrations (**Fig. 2c**). Either LazD or LazE alone had no  
120 activity (**Fig. S6a and b**). In contrast, incubating LazA with LazDEF afforded a single product  
121 containing 4 azoles (**Fig. 2d**). No alkylation occurred on this peptide by IAA suggesting that all Cys  
122 residues were cyclized, and MS/MS analysis of this product supported the native azole pattern, *i.e.* three  
123 thiazoles in positions 5, 7, 13 and one oxazole in position 11 (**Fig. S7**).

124 Next, we attempted to reconstitute the Dha-forming activity (**Fig. 1d**). LazBF is a split dehydratase,  
125 widely conserved in thiopeptide BGCs (**Fig. 1b**).<sup>54,55</sup> These proteins are homologous to class I  
126 lanthipeptide dehydratases, which utilize Glu-tRNA<sup>Glu</sup> to glutamylate Ser or Thr residues in the CP of  
127 a substrate (using the glutamylation domain),<sup>46</sup> and then catalyze elimination of the glutamate to yield  
128 Dha (using the elimination domain). In *laz* BGC, LazB is annotated as a glutamylation domain, and the  
129 N-terminal part of LazF is an elimination domain. Even though we assumed that azole formation  
130 precedes Dha synthesis, we first attempted to test LazB activity on the unmodified LazA. Surprisingly,  
131 LazB glutamylated LazA once when incubated in the presence of synthetic tRNA<sup>Glu</sup> originating from  
132 *S. lactacystinaeus* and glutamyl-tRNA synthetase (**GluRS**) from *S. lividans* (**Fig. 2e**), while reactions  
133 lacking any one component led to no modification (**Fig. S6f-h**). These results indicated that like  
134 homologous enzymes,<sup>56,57</sup> LazB utilizes Glu-charged tRNA<sup>Glu</sup> and catalyzes glutamylation of LazA.  
135 Because *E. coli* tRNA<sup>Glu</sup> and GluRS present in the translation mixture were not accepted, LazB appears  
136 to be specific for the *Streptomyces* tRNA<sup>Glu</sup> and GluRS. The complete dehydratase activity was  
137 reconstituted with the addition of LazF to the mixture, in which case the reaction yielded a singly  
138 dehydrated product (**Fig. 2f**). Extending the reaction time led to sluggish second and third dehydrations  
139 (**Fig. S6i**). These results indicated that LazBF can catalyze formation of some but not all Dha in LazA  
140 independent of azole formation.

141 We next studied whether LazBF forms remaining Dha in an azole-dependent fashion. To this end,  
142 we incubated the LazDEF-treated LazA, bearing 4 azoles, with LazBF, tRNA<sup>Glu</sup> and GluRS. This  
143 reaction led to a major product 90 Da lighter than the 4-azole LazA, consistent with the formation of 5  
144 Dha, suggesting that all available Ser in the CP were dehydrated (**Fig. 2g**). Coincubation of LazA with  
145 LazBDEF, tRNA<sup>Glu</sup> and GluRS resulted in the formation of a complex mixture with the same major  
146 product (**Fig. S6j**).

147 Finally, we tested reconstitution of the entire biosynthetic pathway by adding LazC to the reaction.  
148 The putative pyridine synthase LazC is weakly homologous to TcIM and TbtD, two well-studied  
149 enzymes catalyzing analogous reactions.<sup>38,58</sup> Both enzymes are believed to initiate a [4+2]-  
150 cycloaddition reaction leading to the formation of a macrocyclic product bearing dihydropyridine,  
151 which is further aromatized by eliminating LP as a C-terminal amide (**LP-NH<sub>2</sub>**) to give rise to a pyridine  
152 ring. Accordingly, incubation of the aforementioned LazA bearing 4 azole/5 Dha with LazC afforded  
153 LP-NH<sub>2</sub> accompanied by a thiopeptide 18 Da lighter than expected, indicating that Ser4, unmodified in

154 lactazole A, was dehydrated (Dha4-lactazole A) (**Fig. 2h and i**). MS/MS analysis of this product  
155 confirmed its structure (**Fig. S11**). Lactazole A was a minor product under these reaction conditions.  
156 Changing the order of the enzyme addition (LazDEF followed by LazBC, tRNA<sup>Glu</sup> and GluRS)  
157 suppressed the formation of the overdehydrated product, but still, a mixture of thiopeptides formed (**Fig.**  
158 **2j**). In contrast to the stepwise reactions, coincubation of LazA with the full enzyme set (LazBCDEF,  
159 tRNA<sup>Glu</sup> and GluRS) resulted in the formation of lactazole A and LP-NH<sub>2</sub> with only a trace amount of  
160 Dha4-lactazole A (**Fig. 2k**). LC-MS analysis of the *in vitro* synthesized lactazole A showed that its  
161 molecular weight and HPLC retention time were identical to the authentic *in vivo* synthesized standard  
162 (**Fig. S9**). Additionally, both samples had matching, annotatable CID MS/MS spectra (**Fig. S8 and S10**),  
163 indicating that the one-pot reaction yielded the authentic thiopeptide.

164 In summary, here we demonstrated that the translation product of *lazA* accessed with the FIT system  
165 can be treated with the full set of Laz enzymes to yield lactazole A. We refer to this series of  
166 transformations as the FIT-Laz system.

### 167 **Analysis of substrate tolerance of Laz enzymes**

168 To understand the overall substrate plasticity of *laz* BGC, we next investigated whether the FIT-Laz  
169 system can produce lactazole analogs. We commenced with Ala-scanning mutagenesis and prepared 14  
170 single-point Ala mutants in the CP region of LazA. The precursor peptides were expressed and modified  
171 with the FIT-Laz system, and the reaction outcomes were analyzed by LC-MS as above (**Fig. 3a**). Only  
172 4 Ala mutants, S1A, S10A, S11A, and S12A, abolished formation of thiopeptides, whereas other  
173 constructs led to the formation of corresponding lactazole analogs and LP-NH<sub>2</sub>. During maturation,  
174 Ser1 and Ser12 are converted to Dha and are then utilized by LazC for pyridine  
175 formation/macrocyclization. Moreover, pyridine synthases are known to recognize the modification  
176 pattern around the 4 $\pi$  component,<sup>38</sup> which is consistent with the abrogation of biosynthesis in S10A and  
177 S11A mutants. On the other hand, C13A mutant was converted to a thiopeptide without modifications  
178 in the tail region, suggesting that the Dha10-oxazole11-Dha12 moiety is the minimal recognition motif  
179 around the 4 $\pi$  component for the LazC-catalyzed macrocyclization. Significant accumulation of linear  
180 side-products and partially processed peptides for W2A and G3A mutants indicates that these amino  
181 acids are also important for smooth lactazole biosynthesis. Ala mutants in positions 4–8, 15 and 16,  
182 including those disrupting azole and Dha installation, were tolerated, albeit in some cases a mixture of  
183 thiopeptides formed (**Fig. S12 and S13**).

184 Intrigued by these results, we examined whether non-essential modifications inside the macrocycle  
185 (Ser4–Cys7) can be removed altogether. Indeed, a tetra-Ala mutant, LazA S4-C7A, was converted to a  
186 thiopeptide containing just 2 azoles and 1 Dha upon treatment with the full enzyme set (**Fig. 3b**). A  
187 pentamutant LazA S4-C7A, C13A also afforded a thiopeptide, but at a much lower overall efficiency,  
188 as a number of partially processed linear peptides accumulated after overnight treatment (**Fig. S14a**).  
189 Based on these results, we concluded that the five residues undergoing PTM in LazA S4-C7A (Ser1,  
190 Ser10, Ser11, Ser12 and Cys13) are essential for efficient maturation. We termed the resulting  
191 thiopeptide as the minimal lactazole scaffold, and the corresponding precursor peptide as the minimal



192 lactazole precursor (**LazA<sup>min</sup>**). Because *in vitro* biosynthesis of the minimal lactazole proceeded as  
193 efficiently as the wild type, we decided to investigate enzymatic processing of LazA<sup>min</sup> and its potential  
194 for bioengineering applications in more detail.

195 In the next series of experiments, we examined the tolerance of Laz enzymes to the presence of  
196 charged amino acids in the CP, and performed Lys- and Glu-scanning of LazA<sup>min</sup> CP. Charged amino  
197 acids are rarely found in CPs of thiopeptides,<sup>39-41</sup> and RiPP enzymes from other classes are also known  
198 to disfavor charged amino acids in general, especially negatively charged Asp and Glu close to the  
199 modification site. We prepared 11 single-point Lys mutants and 11 single-point Glu mutants in the non-  
200 essential positions of LazA<sup>min</sup> and analyzed their processing as above (**Fig. S15**). The results of Lys-  
201 scanning revealed that a positively charged amino acid is well tolerated in 9 out of 11 positions, whereas  
202 W2K and A14K mutants suffered from inefficient processing. Glu was less accepted than Lys overall.  
203 In addition to inefficient processing of W2E and A14E, mutants Q8E, A9E and P16E also resulted in  
204 little to no thiopeptide formation. These data suggest that in addition to the five previously identified  
205 amino acids, Trp2 and Ala14 also play an important role in LazA<sup>min</sup> maturation.

206 Next, we sought to establish the minimal and maximum macrocycle sizes accessible with FIT-Laz.  
207 All known thiopeptides range between 26- (thiocillin, thiostrepton and nosiheptide) and 35-membered  
208 macrocycles (berninamycin).<sup>59</sup> Additionally, previously reported bioengineering of thiocillin BGC led  
209 to 23-membered artificial variants.<sup>60</sup> Here, we prepared amino acid insertion and deletion variants of  
210 LazA<sup>min</sup>, and, as before, expressed and modified them with the FIT-Laz system. The results of LC-MS  
211 analysis are summarized in **Fig. 3c**. Deletion of up to 3 amino acids between Ser1 and Ser10 was well  
212 tolerated, and led to the efficient formation of 29- to 23-membered thiopeptides. The 4-6 amino acid  
213 deletion mutants were also competent substrates and yielded 20- to 14-membered macrocycles, but at  
214 relatively low overall efficiencies, as a number of partially processed linear peptides accumulated.  
215 Formation of an 11-membered thiopeptide (deletion of 7 residues) was not observed. Thus, it appears  
216 that 14-membered thiopeptides are the smallest accessible with Laz enzymes, 9 atoms smaller than the  
217 previously smallest thiocillin variants.<sup>60</sup> In contrast, no upper limit on the ring size could be placed. All  
218 tested substrates were accepted by the enzymes: the largest synthesized product bore a 62-membered  
219 macrocycle, which corresponds to a 10 amino acid insertion. The overall processing efficiency  
220 decreased linearly with increasing the cycle size; where LazA<sup>min</sup> itself was efficiently converted to a  
221 macrocycle and LP-NH<sub>2</sub>, substrates with multiple amino acid insertions had substantial accumulation  
222 of linear intermediates and side-products. A recent study demonstrated that TbtD, a LazC homologue  
223 from thiomuracin biosynthesis, could perform an *intermolecular* [4+2]-cycloaddition, whereas TclM,  
224 an enzyme from thiocillin BGC, could not,<sup>61</sup> suggesting that LazC might function similarly to TbtD.  
225 While certainly not intermolecular, the enzyme catalyzed formation of remarkably large macrocycles.  
226 Sequence extension outside of the macrocycle was also easily achievable, as 3 LazA<sup>min</sup> variants with  
227 the C-terminal tail extensions of up to 15 amino acids were efficiently converted to thiopeptides (**Fig.**  
228 **3d and S14b-d**).

229 Encouraged by these results, we examined whether FIT-Laz can accommodate sequence

230 randomization inside the macrocycle. We prepared 10  $LazA^{min}$  variants containing 10 consecutively  
231 randomized amino acids each, which corresponds to the simultaneous insertion of 3 amino acids and  
232 mutation of residues 3–9 in  $LazA^{min}$  CP (see S.I. 2.7 for sequence choices). Expression and modification  
233 of these peptides by FIT-Laz and the subsequent LC-MS analysis (**Fig. 4a**) revealed that 9 out of 10  
234 substrates produced thiopeptides as efficiently as  $LazA^{min}$ . One substrate (**10aa-sub-4**) led to the  
235 formation of multiple thiopeptides owing to three Ser and Thr residues in the inserted region undergoing  
236 differential dehydration (**Fig. S16**), and another variant (**10aa-sub-10**) had major accumulation of  
237 partially processed linear peptides, albeit with detectable formation of the thiopeptide.

238 Finally, we combined sequence randomization inside the macrocycle with the C-terminal extension,  
239 and constructed a  $LazA^{min}$  mutant with a 34 amino acid-long CP. Despite its size, this substrate  
240 efficiently generated a 3.7 kDa thiopeptide when treated with Laz enzymes (**Fig. 4b, S17**), highlighting  
241 the scaffolding ability of key residues in  $LazA^{min}$ .

242 Taken together, these data indicate an unprecedented flexibility of *laz* BGC. Many individual  
243 enzymes and entire RiPP pathways are similarly promiscuous, but thiopeptide biosynthesis is usually  
244 sensitive to much more modest perturbations. These results point to potential applications of *laz* BGC  
245 in bioengineering.

#### 246 **Synthesis of hybrid thiopeptides with FIT-Laz**

247 One advantage of the FIT system is its amenability to genetic code reprogramming. Incorporation  
248 of multiple npAAs can be achieved by adding appropriate orthogonal tRNAs precharged with npAAs  
249 of choice by the use of flexizymes<sup>42</sup> to the translation mixture lacking certain proteinogenic amino acids  
250 and cognate aminoacyl-tRNA synthetases. The FIT system was previously used to synthesize peptides  
251 containing a variety of npAAs, including D-,  $\beta$ -, *N*-methylated-, and  $\alpha,\alpha$ -disubstituted-amino acids as  
252 well as hydroxyacids.<sup>62</sup> Recently, a combination of genetic code reprogramming in the FIT system with  
253 a promiscuous RiPP enzyme also enabled synthesis of peptides containing exotic azoline residues.<sup>63</sup>  
254 Such npAAs are often found in peptidic natural products, both in RiPPs<sup>9</sup> and in non-ribosomally  
255 synthesized peptides (**NRPs**).<sup>64</sup> We reasoned that if  $LazA$  precursors containing ribosomally installed  
256 npAAs are accepted by Laz enzymes, various “hybrid” thiopeptides may be accessible with the FIT-  
257 Laz system.

258 We began by testing the ability of FIT-Laz to produce *N*-methylated thiopeptides, and prepared 12  
259  $lazA^{min}$  mutants bearing a single Met codon (AUG) in the CP. The Met codon was reassigned to either  
260 *N*-methylglycine (<sup>Me</sup>Gly) or *N*-methylalanine (<sup>Me</sup>Ala) by expressing these genes from a Met-depleted  
261 translation mixture in the presence of precharged <sup>Me</sup>Gly-tRNA<sub>CAU</sub> or <sup>Me</sup>Ala-tRNA<sub>CAU</sub> (see S.I. 2.8 for  
262 details). Treatment of these translation products with the full enzyme set (<sup>Me</sup>Gly- and <sup>Me</sup>Ala-scanning  
263 mutagenesis) and the subsequent LC-MS analysis revealed that, similarly to the results of Lys/Glu-  
264 scanning, either of the tested *N*-methylated amino acid was easily accepted in 9 positions, while  
265 mutations at Trp2, Cys13 and Ala14 were detrimental, affording little to no mature thiopeptide (**Fig.**  
266 **S18**).

267 Next, we tested whether more diverse npAAs can be incorporated into the thiopeptide scaffold



268 following the same logic. For this study, we focused on *laza*<sup>min</sup> bearing the AUG codon in position 5,  
269 and analogous to the experiments above, prepared *LazA*<sup>min</sup> variants containing D-Ala, D-Ser,  
270 cycloleucine (cLeu), pentafluorophenylalanine (Phe(F<sub>5</sub>)), 5-hydroxy-tryptophan (Trp(5-OH)), lactic  
271 acid (<sup>HO</sup>Ala), β-Met, and β-homoleucine (β-hLeu). All of these substrates were smoothly converted to  
272 the corresponding thiopeptides by the action of Laz enzymes, affording hybrid thiopeptides containing  
273 a variety of npAAs (**Fig. 5a**).

274 Finally, we studied whether multiple different npAAs can be simultaneously incorporated into the  
275 minimal lactazole scaffold to generate highly artificial “pseudo-natural” macrocycles. Due to the  
276 presence of a 38-residue LP in *LazA*<sup>min</sup>, the codon boxes available for reprogramming are limited (see  
277 S.I. 2.8 for details). After some experimentation, we opted to reprogram four codons (AAG, CAU, UGG  
278 and UUU), and reassigned them as <sup>Me</sup>Gly, cLeu, Phe(F<sub>5</sub>) and <sup>Me</sup>Ala, respectively. To this end, a DNA  
279 template encoding *laza*<sup>min</sup> with 4 codons of interest (**Fig. 5b and 5c**) was incubated in a  
280 Lys/His/Phe/Trp-depleted translation reaction with <sup>Me</sup>Gly-tRNA<sub>CUU</sub>, <sup>Me</sup>Ala-tRNA<sub>AAA</sub>, cLeu-tRNA<sub>GUG</sub>,  
281 and Phe(F<sub>5</sub>)-tRNA<sub>CCA</sub> to yield a *LazA* precursor peptide bearing 4 npAAs. Treating this substrate with  
282 *LazBDEF*/tRNA<sup>Glu</sup>/GluRS afforded a fully processed linear precursor bearing 2 azoles and 3 Dha (**Fig.**  
283 **S19**), while the reaction utilizing the full enzyme set led to the formation of the predicted thiopeptide  
284 accompanied by LP-NH<sub>2</sub> (**Fig. 5d**). The identities of this macrocycle and its linear precursor were  
285 confirmed by CID MS/MS analysis (**Fig. S19 and S20**). From these experiments, we conclude that the  
286 FIT-Laz system offers facile access to previously inaccessible hybrid thiopeptides, including novel  
287 heavily modified pseudo-natural architectures. These results additionally underscore the promiscuity of  
288 Laz enzymes, as all tested substrates containing disruptive amino acids outside of the canonical  
289 Ramachandran space were efficiently converted to mature thiopeptides.

## 290 Discussion

291 In this study, we completed *in vitro* reconstitution of *laz* BGC, which is responsible for biosynthesis  
292 of lactazole A, a cryptic thiopeptide from *S. lactacystinaeus*. This is the first *in vitro* reconstitution of  
293 an entire thiopeptide BGC, and the second reconstitution of biosynthetic enzymes involved in the  
294 formation of a primary thiopeptide macrocycle.<sup>65</sup> The FIT-Laz system established in this study enabled  
295 rapid access to numerous *LazA* variants; the entire workflow from PCR assembly of *laza* DNA  
296 templates to LC-MS analysis of reaction outcomes fits within two working days. An added benefit of  
297 working with an *in vitro* reconstituted BGC is the ability to decouple self-immunity, export and  
298 proteolytic stability issues, so often complicating *in vivo* studies, from direct assaying of enzymatic  
299 activities. Conversely, *in vitro* experiments provide no insight into *in vivo* fates and metabolism of the  
300 underlying natural product, and thus, should be interpreted accordingly.

301 The results presented here indicate that *all* Laz enzymes tolerate substantial disruptions in the  
302 structure of the precursor peptide (**Fig. 6a**), which stands in contrast to other thiopeptide BGCs  
303 characterized to date. Out of 102 structurally diverse precursor peptides tested in this work, 92 yielded  
304 lactazole-like thiopeptides, 73 of which were accessed with efficiencies comparable to wild type  
305 lactazole A (Table S8). How the enzymes manage to properly modify such a diverse set of substrates

306 remains to be demonstrated. For now, it is apparent that Laz enzymes are highly cooperative. For  
307 instance, addition of LazF to LazDE orchestrates efficient cyclodehydrations (**Fig. 2c vs. Fig. 2d**), LazC  
308 prevents overdehydration by LazBF (**Fig. 2h vs. Fig. 2j**), and unaminoacylated *S. lactacystinaeus*  
309 tRNA<sup>Glu</sup> somehow affects azole formation mediated by LazDEF in the presence of LazB (**Fig. S6e vs.**  
310 **Fig. 2d and S6c–d**). Combined with the fact that some Dha can form independent from azole  
311 installation, it is likely that the biosynthetic mechanism is more elaborate than the “azoles form first,  
312 Dha second” paradigm observed during thiomuracin biosynthesis<sup>47</sup> and frequently assumed for other  
313 RiPPs. Investigations into the nature of this cooperativity are a subject of our ongoing studies.

314 Broad substrate scope of Laz enzymes enabled development of the minimal lactazole scaffold (**Fig.**  
315 **6a and b**). This thiopeptide requires only 6 PTM events (formation of 2 azoles, 3 Dha and a pyridine  
316 heterocycle) for macrocyclization, and is biosynthetically the simplest known thiopeptide to date. The  
317 5 amino acids undergoing these modifications – Ser1, Ser10, Ser11, Ser12 and Cys13 – are  
318 indispensable for efficient macrocycle assembly, and further experiments demonstrated that the residues  
319 adjacent to the modification sites, Trp2 and Ala14, are also important for efficient biosynthesis.  
320 Remaining positions (3–9, 15, 16) accept a variety of amino acids, including disruptive npAAs.  
321 Modification of minimal lactazole precursor, LazA<sup>min</sup>, in the FIT-Laz system is robust, and tolerates  
322 massive sequence variations. Specifically, the macrocycle can be contracted or expanded to synthesize  
323 14- to 62-membered thiopeptides (2 to 18 unmodified amino acids inside the macrocycle; **Fig. 6c and**  
324 **6d**), and the variants with up to 18 amino acid-long tails are accessible as well (**Fig. 6e**). Most  
325 importantly, LazA<sup>min</sup> can accommodate mutations of consecutive amino acids, as demonstrated by the  
326 synthesis of thiopeptides with 10 randomized amino acids inside the macrocycle (**Fig. 6e**).

327 This flexibility of the lactazole biosynthetic machinery, combined with the minimal size of *laz* BGC,  
328 which contains only the genes essential for macrocyclization, suggest that the minimal thiopeptide  
329 scaffold may be an excellent candidate for bioengineering. Because continuous randomized epitopes  
330 can be displayed inside a thiopeptide backbone, we envision that combinatorial libraries based on this  
331 scaffold can be generated and screened akin to the recent reports on lanthipeptide bioengineering.<sup>12–16</sup>  
332 In those cases, lanthipeptide libraries were prepared with the use of promiscuous lanthipeptide synthases,  
333 and could be screened against a protein target of interest with the use of phage/yeast display or with the  
334 reverse two-hybrid system. These studies resulted in the discovery of lanthipeptide inhibitors of HIV  
335 budding process,<sup>15</sup> urokinase plasminogen activator<sup>16</sup> and  $\alpha_v\beta_3$  integrin binders.<sup>13</sup> Similarly, we  
336 anticipate that the integration of the FIT-Laz system with powerful *in vitro* screening techniques such  
337 as mRNA display<sup>66</sup> will provide access to artificial thiopeptides with desirable pharmacological profiles  
338 for drug discovery purposes.

339 Synthesis of thiopeptide hybrids with other RiPP and NRP classes represents another bioengineering  
340 avenue explored in this work. Combinatorial biosynthesis is a concept from NRP and PKS fields, where  
341 enzymes from different BGCs are combined to act on a single substrate to generate novel natural  
342 products.<sup>67,68</sup> This concept has recently been applied to RiPPs either via simultaneous use of enzymes  
343 from near-cognate BGCs<sup>69</sup> or by devising chimeric LPs,<sup>70</sup> demonstrating that multiple promiscuous

344 enzymes can act together to produce nonnatural hybrid RiPPs. *In vitro* genetic code reprogramming,  
345 easily achievable with FIT-Laz, offers an alternative route to similar hybrids, many of which are  
346 inaccessible by existing methods. We demonstrated that thiopeptide-NRP hybrids (macrocycles  
347 containing hydroxyacids, D-,  $\beta$ -, N-methylated-, and  $\alpha,\alpha$ -disubstituted-amino acids), thiopeptide-RiPP  
348 hybrids (N-methylation and D-amino acids are found in borosins,<sup>71</sup> lanthipeptides,<sup>54</sup> proteusins,<sup>72</sup>  
349 phallotoxins<sup>73</sup> and many other RiPPs families<sup>9</sup>), and thiopeptides with “anthropogenic” amino acids not  
350 found in nature (Phe(F<sub>5</sub>) and cLeu) can be routinely accessed with FIT-Laz. Such noncanonical hybrid  
351 architectures can further expand the range of available molecular complexity for biotechnology and  
352 drug discovery. Overall, we believe that the established FIT-Laz system opens exciting new  
353 opportunities for thiopeptide engineering and characterization of natural thiopeptide diversity.

## 354 **Acknowledgements**

355 We thank Dr. Kazuya Teramoto, Dr. Takayuki Kuge, Mr. Kakeru Narumi and Dr. Emiko Nagai for their  
356 help with protein expression. This work was supported by PRESTO, Japan Science and Technology  
357 Agency (JST) to Y.G.; CREST for Molecular Technologies, JST to H.S.; KAKENHI (JP16H06444 to  
358 H.S. and Y.G. and H.O.; JP17H04762, JP18H04382, and JP19K22243 to Y.G.) from the Japan Society  
359 for the Promotion of Science (JSPS); a grant-in-aid from the Institute for Fermentation, Osaka (IFO) to  
360 H.O., S.A. and T.O.; Amano Enzyme, Inc. to H.O and S.A.; and the A3 Foresight Program, JSPS to H.O.  
361 and S.A.

## 362 **References**

- 363 1. Bagley, M. C., Dale, J. W., Merritt, E. A. & Xiong, X. Thiopeptide Antibiotics. *Chem. Rev.* **105**, 685–714  
364 (2005).
- 365 2. Donia, M. S. *et al.* A Systematic Analysis of Biosynthetic Gene Clusters in the Human Microbiome  
366 Reveals a Common Family of Antibiotics. *Cell* **158**, 1402–1414 (2014).
- 367 3. Just-Baringo, X., Albericio, F. & Álvarez, M. *Thiopeptide antibiotics: Retrospective and recent advances.*  
368 *Marine Drugs* (2014). doi:10.3390/md12010317
- 369 4. Mullane, K. *et al.* Multicenter, Randomized Clinical Trial To Compare the Safety and Efficacy of LFF571  
370 and Vancomycin for Clostridium difficile Infections. *Antimicrob. Agents Chemother.* **59**, 1435–1440  
371 (2015).
- 372 5. Kelly, W. L., Pan, L. & Li, C. Thiostrepton Biosynthesis: Prototype for a New Family of Bacteriocins. *J.*  
373 *Am. Chem. Soc.* **131**, 4327–4334 (2009).
- 374 6. Liao, R. *et al.* Thiopeptide Biosynthesis Featuring Ribosomally Synthesized Precursor Peptides and  
375 Conserved Posttranslational Modifications. *Chem. Biol.* **16**, 141–147 (2009).
- 376 7. Wieland Brown, L. C., Acker, M. G., Clardy, J., Walsh, C. T. & Fischbach, M. A. Thirteen posttranslational  
377 modifications convert a 14-residue peptide into the antibiotic thiocillin. *Proc. Natl. Acad. Sci.* **106**, 2549–  
378 2553 (2009).
- 379 8. Morris, R. P. *et al.* Ribosomally Synthesized Thiopeptide Antibiotics Targeting Elongation Factor Tu. *J.*  
380 *Am. Chem. Soc.* **131**, 5946–5955 (2009).

- 381 9. Arnison, P. G. *et al.* Ribosomally synthesized and post-translationally modified peptide natural products:  
382 overview and recommendations for a universal nomenclature. *Nat. Prod. Rep.* **30**, 108–160 (2013).
- 383 10. Hudson, G. A. & Mitchell, D. A. RiPP antibiotics: biosynthesis and engineering potential. *Curr. Opin.*  
384 *Microbiol.* **45**, 61–69 (2018).
- 385 11. Goto, Y. & Suga, H. Engineering of RiPP pathways for the production of artificial peptides bearing various  
386 non-proteinogenic structures. *Curr. Opin. Chem. Biol.* **46**, 82–90 (2018).
- 387 12. Schmitt, S. *et al.* Analysis of modular bioengineered antimicrobial lanthipeptides at nanoliter scale. *Nat.*  
388 *Chem. Biol.* **15**, 437–443 (2019).
- 389 13. Hegemann, J. D., Bobeica, S. C., Walker, M. C., Bothwell, I. R. & van der Donk, W. A. Assessing the  
390 Flexibility of the Prochlorosin 2.8 Scaffold for Bioengineering Applications. *ACS Synth. Biol.* **8**, 1204–  
391 1214 (2019).
- 392 14. Hetrick, K. J., Walker, M. C. & van der Donk, W. A. Development and Application of Yeast and Phage  
393 Display of Diverse Lanthipeptides. *ACS Cent. Sci.* **4**, 458–467 (2018).
- 394 15. Yang, X. *et al.* A lanthipeptide library used to identify a protein-protein interaction inhibitor. *Nat. Chem.*  
395 *Biol.* **14**, 375–380 (2018).
- 396 16. Urban, J. H. *et al.* Phage display and selection of lanthipeptides on the carboxy-terminus of the gene-3  
397 minor coat protein. *Nat. Commun.* **8**, 1500 (2017).
- 398 17. Ruffner, D. E., Schmidt, E. W. & Heemstra, J. R. Assessing the Combinatorial Potential of the RiPP  
399 Cyanobactin tru Pathway. *ACS Synth. Biol.* **4**, 482–492 (2015).
- 400 18. Sardar, D. & Schmidt, E. W. Combinatorial biosynthesis of RiPPs: Docking with marine life. *Curr. Opin.*  
401 *Chem. Biol.* **31**, 15–21 (2016).
- 402 19. Reyna-González, E., Schmid, B., Petras, D., Süßmuth, R. D. & Dittmann, E. Leader Peptide-Free In Vitro  
403 Reconstitution of Microviridin Biosynthesis Enables Design of Synthetic Protease-Targeted Libraries.  
404 *Angew. Chem., Int. Ed* **55**, 9398–9401 (2016).
- 405 20. Young, T. S., Dorrestein, P. C. & Walsh, C. T. Codon Randomization for Rapid Exploration of Chemical  
406 Space in Thiopeptide Antibiotic Variants. *Chem. Biol.* **19**, 1600–1610 (2012).
- 407 21. Zhang, F. & Kelly, W. L. Saturation Mutagenesis of TsrA Ala4 Unveils a Highly Mutable Residue of  
408 Thiostrepton A. *ACS Chem. Biol.* **10**, 998–1009 (2015).
- 409 22. Wang, S., Zheng, X., Pan, Q. & Chen, Y. Mutagenesis of precursor peptide for the generation of  
410 nosiheptide analogues. *RSC Adv.* **6**, 94643–94650 (2016).
- 411 23. Tran, H. L. *et al.* Structure–Activity Relationship and Molecular Mechanics Reveal the Importance of  
412 Ring Entropy in the Biosynthesis and Activity of a Natural Product. *J. Am. Chem. Soc.* **139**, 2541–2544  
413 (2017).
- 414 24. Bowers, A. A., Acker, M. G., Koglin, A. & Walsh, C. T. Manipulation of Thiocillin Variants by Prepeptide  
415 Gene Replacement: Structure, Conformation, and Activity of Heterocycle Substitution Mutants. *J. Am.*  
416 *Chem. Soc.* **132**, 7519–7527 (2010).
- 417 25. Bennallack, P. R. *et al.* Reconstitution and Minimization of a Micrococцин Biosynthetic. *J. Bacteriol.* **198**,  
418 2431–2438 (2016).

- 419 26. Luo, X. *et al.* Recombinant thiopeptides containing noncanonical amino acids. *Proc. Natl. Acad. Sci.* **113**,  
420 3615–3620 (2016).
- 421 27. Ichikawa, H., Bashiri, G. & Kelly, W. L. Biosynthesis of the Thiopeptins and Identification of an F420H2-  
422 Dependent Dehydropiperidine Reductase. *J. Am. Chem. Soc.* **140**, 10749–10756 (2018).
- 423 28. Mahanta, N., Zhang, Z., Hudson, G. A., van der Donk, W. A. & Mitchell, D. A. Reconstitution and  
424 Substrate Specificity of the Radical S-Adenosyl-methionine Thiazole C-Methyltransferase in  
425 Thiomuracin Biosynthesis. *J. Am. Chem. Soc.* **139**, 4310–4313 (2017).
- 426 29. LaMattina, J. W. *et al.* NosN, a Radical S-Adenosylmethionine Methylase, Catalyzes Both C1 Transfer  
427 and Formation of the Ester Linkage of the Side-Ring System during the Biosynthesis of Nosiheptide.  
428 *Journal of the American Chemical Society* **139**, 17438–17445 (2017).
- 429 30. Badding, E. D. *et al.* Rerouting the Pathway for the Biosynthesis of the Side Ring System of Nosiheptide:  
430 The Roles of NosI, NosJ, and NosK. *J. Am. Chem. Soc.* **139**, 5896–5905 (2017).
- 431 31. Ding, W. *et al.* Biosynthesis of nosiheptide indole side ring centers on a cryptic carrier protein NosJ. *Nat.*  
432 *Commun.* **8**, 437 (2017).
- 433 32. Just-Baringo, X., Albericio, F. & Alvarez, M. Thiopeptide Engineering: A Multidisciplinary Effort towards  
434 Future Drugs. *Angew. Chem., Int. Ed.* **53**, 6602–6616 (2014).
- 435 33. LaMarche, M. J. *et al.* Discovery of LFF571: An investigational agent for Clostridium difficile infection.  
436 *J. Med. Chem.* **55**, 2376–2387 (2012).
- 437 34. LaMarche, M. J. *et al.* Antibiotic Optimization and Chemical Structure Stabilization of Thiomuracin A. *J.*  
438 *Med. Chem.* **55**, 6934–6941 (2012).
- 439 35. LaMarche, M. J. *et al.* 4-Aminothiazolyl analogues of GE2270 A: Antibacterial Lead Finding. *J. Med.*  
440 *Chem.* **54**, 2517–2521 (2011).
- 441 36. Fleming, S. R., Vinogradov, A. A., Bowers, A. A., Suga, H. & Goto, Y. Flexizyme-enabled benchtop  
442 biosynthesis of thiopeptides. *J. Am. Chem. Soc.* **141**, 758–762 (2019).
- 443 37. Wever, W. J. *et al.* Chemoenzymatic Synthesis of Thiazolyl Peptide Natural Products Featuring an  
444 Enzyme-Catalyzed Formal [4 + 2] Cycloaddition. *J. Am. Chem. Soc.* **137**, 3494–3497 (2015).
- 445 38. Wever, W. J., Bogart, J. W. & Bowers, A. A. Identification of Pyridine Synthase Recognition Sequences  
446 Allows a Modular Solid-Phase Route to Thiopeptide Variants. *J. Am. Chem. Soc.* **138**, 13461–13464  
447 (2016).
- 448 39. Hayashi, S. *et al.* Genome Mining Reveals a Minimum Gene Set for the Biosynthesis of 32-Membered  
449 Macrocyclic Thiopeptides Lactazoles. *Chem. Biol.* **21**, 679–688 (2014).
- 450 40. Burkhardt, B. J., Schwalen, C. J., Mann, G., Naismith, J. H. & Mitchell, D. A. YcaO-Dependent  
451 Posttranslational Amide Activation: Biosynthesis, Structure, and Function. *Chem. Rev.* **117**, 5389–5456  
452 (2017).
- 453 41. Schwalen, C. J., Hudson, G. A., Kille, B. & Mitchell, D. A. Bioinformatic Expansion and Discovery of  
454 Thiopeptide Antibiotics. *J. Am. Chem. Soc.* **140**, 9494–9501 (2018).
- 455 42. Goto, Y., Katoh, T. & Suga, H. Flexizymes for genetic code reprogramming. *Nat. Protoc.* **6**, 779–790  
456 (2011).



- 457 43. The *lazA* sequence used in this study lacked codons for three C-terminal amino acids (Gln-Asp-Met)  
458 present in the wild type structural gene. These amino acids are proteolytically removed by an unspecified  
459 protease during the maturation process of lactazole A.
- 460 44. Goto, Y., Ito, Y., Kato, Y., Tsunoda, S. & Suga, H. One-Pot Synthesis of Azoline-Containing Peptides in a  
461 Cell-free Translation System Integrated with a Posttranslational Cyclodehydratase. *Chem. Biol.* **21**, 766–  
462 774 (2014).
- 463 45. Ozaki, T. *et al.* Dissection of goadsporin biosynthesis by in vitro reconstitution leading to designer  
464 analogues expressed in vivo. *Nat. Commun.* **8**, 14207 (2017).
- 465 46. Ozaki, T. *et al.* Insights into the Biosynthesis of Dehydroalaninesin Goadsporin. *ChemBioChem* **17**, 218–  
466 223 (2016).
- 467 47. Zhang, Z. *et al.* Biosynthetic Timing and Substrate Specificity for the Thiopeptide Thiomuracin. *J. Am.*  
468 *Chem. Soc.* **138**, 15511–15514 (2016).
- 469 48. Koehnke, J. *et al.* Structural analysis of leader peptide binding enables leader-free cyanobactin processing.  
470 *Nat. Chem. Biol.* **11**, 558–563 (2015).
- 471 49. Burkhart, B. J., Hudson, G. A., Dunbar, K. L. & Mitchell, D. A. A prevalent peptide-binding domain  
472 guides ribosomal natural product biosynthesis. *Nat. Chem. Biol.* **11**, 564–570 (2015).
- 473 50. Dunbar, K. L. *et al.* Discovery of a new ATP-binding motif involved in peptidic azoline biosynthesis. *Nat.*  
474 *Chem. Biol.* **10**, 823–829 (2014).
- 475 51. Ghilarov, D. *et al.* Architecture of Microcin B17 Synthetase: An Octameric Protein Complex Converting  
476 a Ribosomally Synthesized Peptide into a DNA Gyrase Poison. *Mol. Cell* **73**, 749-762.e5 (2019).
- 477 52. Gao, S., Ge, Y., Bent, A. F., Schwarz-Linek, U. & Naismith, J. H. Oxidation of the Cyanobactin Precursor  
478 Peptide Is Independent of the Leader Peptide and Operates in a Defined Order. *Biochemistry* **57**, 5996–  
479 6002 (2018).
- 480 53. Melby, J. O., Li, X. & Mitchell, D. A. Orchestration of enzymatic processing by thiazole/oxazole-modified  
481 microcin dehydrogenases. *Biochemistry* **53**, 413–422 (2014).
- 482 54. Repka, L. M., Chekan, J. R., Nair, S. K. & van der Donk, W. A. Mechanistic Understanding of  
483 Lanthipeptide Biosynthetic Enzymes. *Chem. Rev.* **117**, 5457–5520 (2017).
- 484 55. Moutiez, M., Belin, P. & Gondry, M. Aminoacyl-tRNA-Utilizing Enzymes in Natural Product  
485 Biosynthesis. *Chem. Rev.* **117**, 5578–5618 (2017).
- 486 56. Ortega, M. A. *et al.* Structure and mechanism of the tRNA-dependent lantibiotic dehydratase NisB. *Nature*  
487 **517**, 509–512 (2015).
- 488 57. Ortega, M. A. *et al.* Structure and tRNA Specificity of MibB, a Lantibiotic Dehydratase from  
489 Actinobacteria Involved in NAI-107 Biosynthesis. *Cell Chem. Biol.* **23**, 370–380 (2016).
- 490 58. Cogan, D. P. *et al.* Structural insights into enzymatic [4+2] aza- cycloaddition in thiopeptide antibiotic  
491 biosynthesis. *Proc. Natl. Acad. Sci.* **114**, 12928–12933 (2017).
- 492 59. Malcolmson, S. J., Young, T. S., Ruby, J. G., Skewes-Cox, P. & Walsh, C. T. The posttranslational  
493 modification cascade to the thiopeptide berninamycin generates linear forms and altered macrocyclic  
494 scaffolds. *Proc. Natl. Acad. Sci.* **110**, 9483–8488 (2013).



- 495 60. Bowers, A. A., Acker, M. G., Young, T. S. & Walsh, C. T. Generation of Thiocillin Ring Size Variants by  
496 Prepeptide Gene Replacement and in Vivo Processing by *Bacillus cereus*. *J. Am. Chem. Soc.* **134**, 10313–  
497 10316 (2012).
- 498 61. Bogart, J. W. & Bowers, A. A. Thiopeptide Pyridine Synthase TbtD Catalyzes an Intermolecular Formal  
499 Aza-Diels–Alder Reaction. *J. Am. Chem. Soc.* **141**, 1842–1846 (2019).
- 500 62. Rogers, J. M. & Suga, H. Discovering functional, non-proteinogenic amino acid containing, peptides  
501 using genetic code reprogramming. *Org. Biomol. Chem.* **13**, 9353–9363 (2015).
- 502 63. Goto, Y. & Suga, H. In vitro biosynthesis of peptides containing exotic azoline analogs. *ChemBioChem*  
503 **ASAP**, (2019).
- 504 64. Süßmuth, R. D. & Mainz, A. Nonribosomal Peptide Synthesis — Principles and Prospects. *Angew. Chem.,*  
505 *Int. Ed.* **56**, 3770–3821 (2017).
- 506 65. Hudson, G. A., Zhang, Z., Tietz, J. I., Mitchell, D. A. & van der Donk, W. A. In Vitro Biosynthesis of the  
507 Core Scaffold of the Thiopeptide Thiomuracin. *J. Am. Chem. Soc.* **137**, 16012–16015 (2015).
- 508 66. Huang, Y., Wiedmann, M. M. & Suga, H. RNA Display Methods for the Discovery of Bioactive  
509 Macrocycles. *Chem. Rev.* **119**, 10360–10391 (2019).
- 510 67. Wong, F. T. & Khosla, C. Combinatorial biosynthesis of polyketides — a perspective. *Curr. Opin. Chem.*  
511 *Biol.* **16**, 117–123 (2012).
- 512 68. Kim, E., Moore, B. S. & Yoon, Y. J. Reinvigorating natural product combinatorial biosynthesis with  
513 synthetic biology. *Nat. Chem. Biol.* **11**, 649–659 (2015).
- 514 69. Sardar, D., Lin, Z. & Schmidt, E. W. Modularity of RiPP Enzymes Enables Designed Synthesis of  
515 Decorated Peptides. *Chem. Biol.* **22**, 907–916 (2015).
- 516 70. Burkhart, B. J., Kakkar, N., Hudson, G. A., van der Donk, W. A. & Mitchell, D. A. Chimeric Leader  
517 Peptides for the Generation of Non-Natural Hybrid RiPP Products. *ACS Cent. Sci.* **3**, 629–638 (2017).
- 518 71. Velden, N. S. Van Der *et al.* Autocatalytic backbone N-methylation in a family of ribosomal peptide  
519 natural products. *Nat. Chem. Biol.* **13**, 833–835 (2017).
- 520 72. Freeman, M. F., Helf, M. J., Bhushan, A., Morinaka, B. I. & Piel, J. Seven enzymes create extraordinary  
521 complexity in an uncultivated bacterium. *Nat. Chem.* **9**, 387–395 (2016).
- 522 73. Walton, J. D., Hallen-Adams, H. E. & Luo, H. Ribosomal biosynthesis of the cyclic peptide toxins of  
523 *Amanita* mushrooms. *Biopolymers* **94**, 659–664 (2010).
- 524

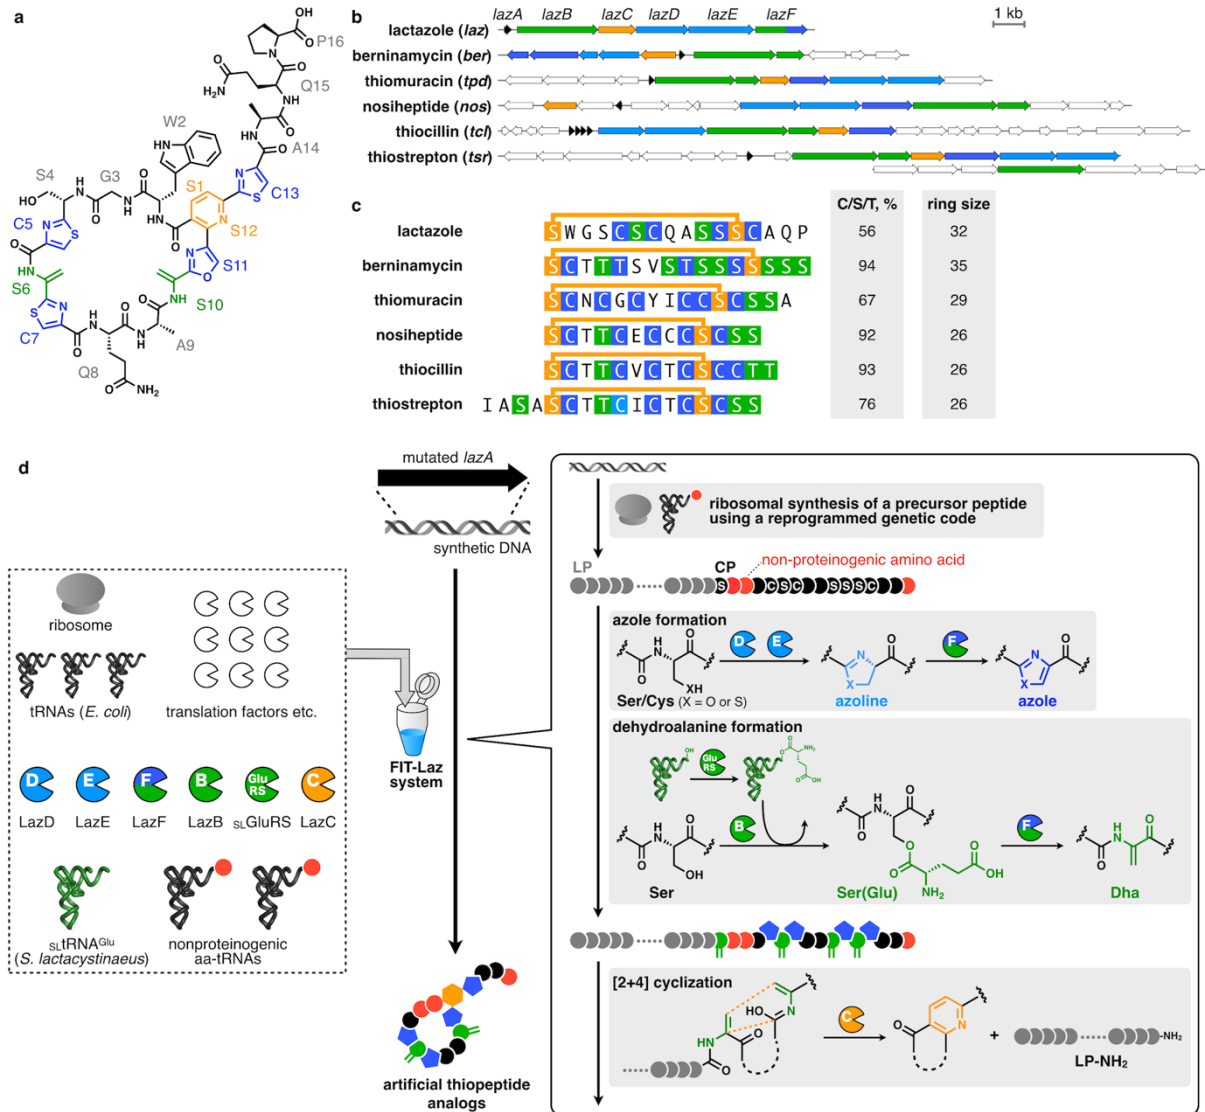

525

526 **Figure 1.** Lactazole A and its biosynthesis with the FIT-Laz system. **(a)** Chemical structure of lactazole

527 A. **(b)** Comparison of *laz* BGC to other prototypical thiopeptide BGCs. Homologs of *laz* genes are

528 color-coded. Genes encoding enzymes responsible for the installation of azolines, azoles,

529 dehydroalanine, and pyridine are shown in light blue, blue, green, and orange, respectively. Precursor

530 peptide structural genes are shown in black, and ancillary genes absent from *laz* BGC are in white. **(c)**

531 Comparison of primary sequences for thiopeptides from panel (b), with the same PTM color coding.

532 The comparison reveals an unusual macrocycle size, low C/S/T content and the absence of azole

533 modification in position 2 as unique features of lactazole. **(d)** Summary of the FIT-Laz system and the

534 roles of individual enzymes during lactazole biosynthesis. In FIT-Laz, synthetic DNA templates

535 encoding LazA or its mutants are *in vitro* transcribed and translated to generate precursor peptides,

536 which undergo a cascade of PTMs introduced by lactazole biosynthetic enzymes to yield lactazole A or

537 its artificial analogs.

538

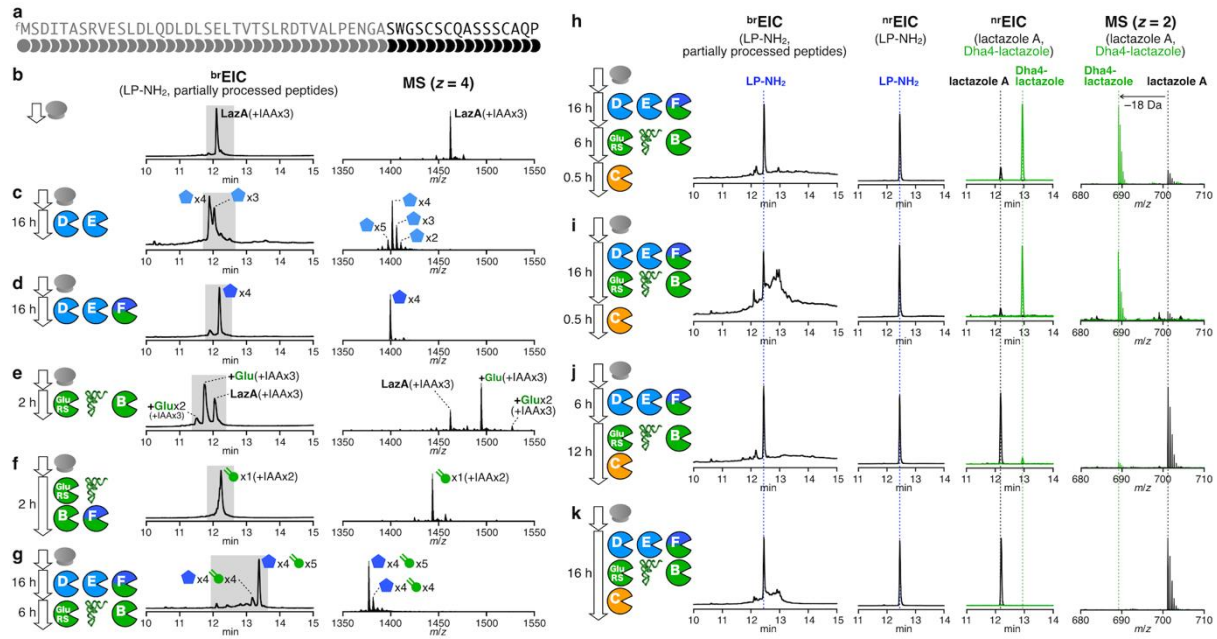

539

540 **Figure 2.** Reconstitution of *in vitro* lactazole A biosynthesis. (a) Primary amino acid sequence of LazA  
541 precursor peptide. (b) – (g) Reconstitution of azole and Dha formation in FIT-Laz. LazA precursor  
542 peptide produced with the FIT system was treated with a combination of Laz enzymes as indicated in  
543 each panel and the reaction outcomes were analyzed by LC-MS. Displayed are  $\text{brEIC}$  LC-MS  
544 chromatograms and composite mass spectra integrated over a time period shaded in the corresponding  
545 chromatograms. See S.I 2.6 and 2.10 for details on reaction conditions and the explanation of  $\text{brEIC}$   
546 chromatograms. (h) – (k) Reconstitution of lactazole A biosynthesis in FIT-Laz. Displayed are LC-MS  
547 chromatograms (left to right:  $\text{brEIC}$ ;  $\text{nrEIC}$  at  $m/z$  1026.77 for LP-NH<sub>2</sub> generated during the final  
548 macrocyclization step; overlaid  $\text{nrEIC}$ s at  $m/z$  701.20 for lactazole A shown in black, and at  $m/z$  692.20  
549 for Dha4-lactazole in green) and overlaid mass spectra for the lactazole A and Dha4-lactazole. These  
550 results demonstrate that the order of enzyme addition is critical to the success of lactazole A biosynthesis.  
551

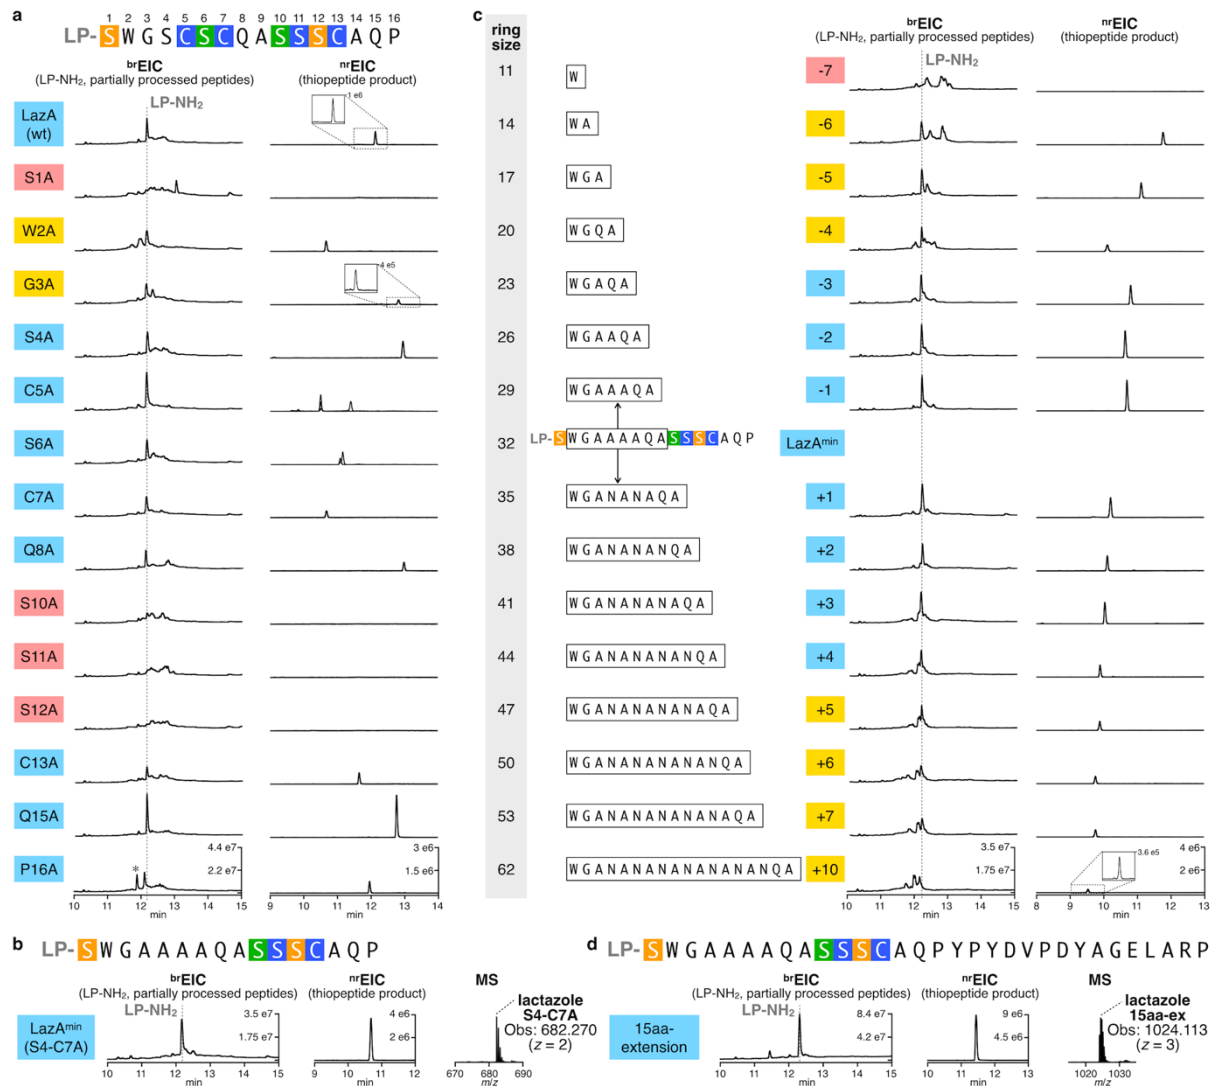

552

553

554

555

556

557

558

559

560

561

562

563

564

565

566

567

**Figure 3.** Substrate scope of the FIT-Laz system. **(a)** Ala scanning of the LazA CP. Single-point Ala mutants of LazA were treated with the full enzyme set and the outcomes were analyzed by LC-MS. Displayed are LC-MS chromatograms (<sup>br</sup>EIC chromatograms on the left showing partially processed linear peptides and LP-NH<sub>2</sub> after enzymatic treatment, and <sup>nr</sup>EIC chromatograms on the right for expected thiopeptides generated at *m/z* 0.10 tolerance window). For mutants highlighted in light blue biosynthesis proceeded efficiently; yellow highlighting indicates inefficient thiopeptide formation accompanied by the accumulation of linear intermediates and side-products; red – mutants that failed to yield a detectable thiopeptide. Peaks denoted with an asterisk (\*) indicate translation side-products. Mutants C5A and S6A gave 4 and 2 thiopeptides, respectively, annotations of which can be found in **Fig. S12 and S13**. Y-axes are scaled between samples for each chromatogram type. **(b)** LC-MS chromatograms as in (a) for the enzymatic processing of LazA<sup>min</sup> on the left with a zoomed-in mass spectrum of the produced thiopeptide on the right. **(c)** LC-MS chromatograms as in (a) for ring expansion and contraction study of LazA<sup>min</sup>. **(d)** LC-MS chromatograms and mass spectrum as in (b) for a LazA<sup>min</sup> variant containing a 15-amino acid extension in the tail region. Collectively, these data point to the remarkable substrate tolerance of Laz enzymes.

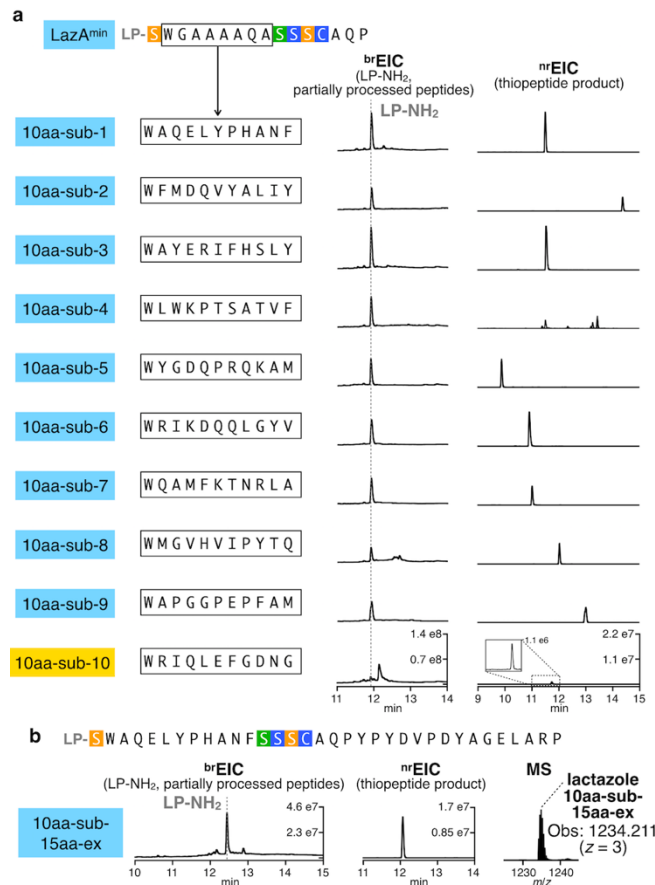

568

569 **Figure 4.** Synthesis of lactazole-like thiopeptides with randomized sequences. **(a)** LazA<sup>min</sup> variants  
570 containing 10 consecutively randomized amino acids were first treated with LazDEF, and then with  
571 LazBC, tRNA<sup>Glu</sup> and GluRS (see S.I. 2.6 for details) and the outcomes were analyzed by LC-MS.  
572 Displayed are LC-MS chromatograms (<sup>br</sup>EIC on the left showing partially processed linear peptides and  
573 LP-NH<sub>2</sub> after enzymatic treatment, and <sup>nr</sup>EIC chromatograms on the right for expected thiopeptides  
574 generated at *m/z* 0.10 tolerance window). Mutants highlighted in light blue indicate efficient thiopeptide  
575 assembly; in yellow – inefficient thiopeptide formation accompanied by the accumulation of linear  
576 intermediates and side-products. One construct, 10aa-sub4, resulted in 8 different thiopeptides, partial  
577 annotation of which can be found in **Fig. S16**. Efficient *in vitro* biosynthesis observed in 9 out of 10  
578 cases underscores the substrate plasticity of FIT-Laz. **(b)** LC-MS chromatograms as in (a) for the  
579 enzymatic processing of a 34 amino acid-long LazA<sup>min</sup> variant on the left with a zoomed-in mass  
580 spectrum of the produced thiopeptide on the right.

581

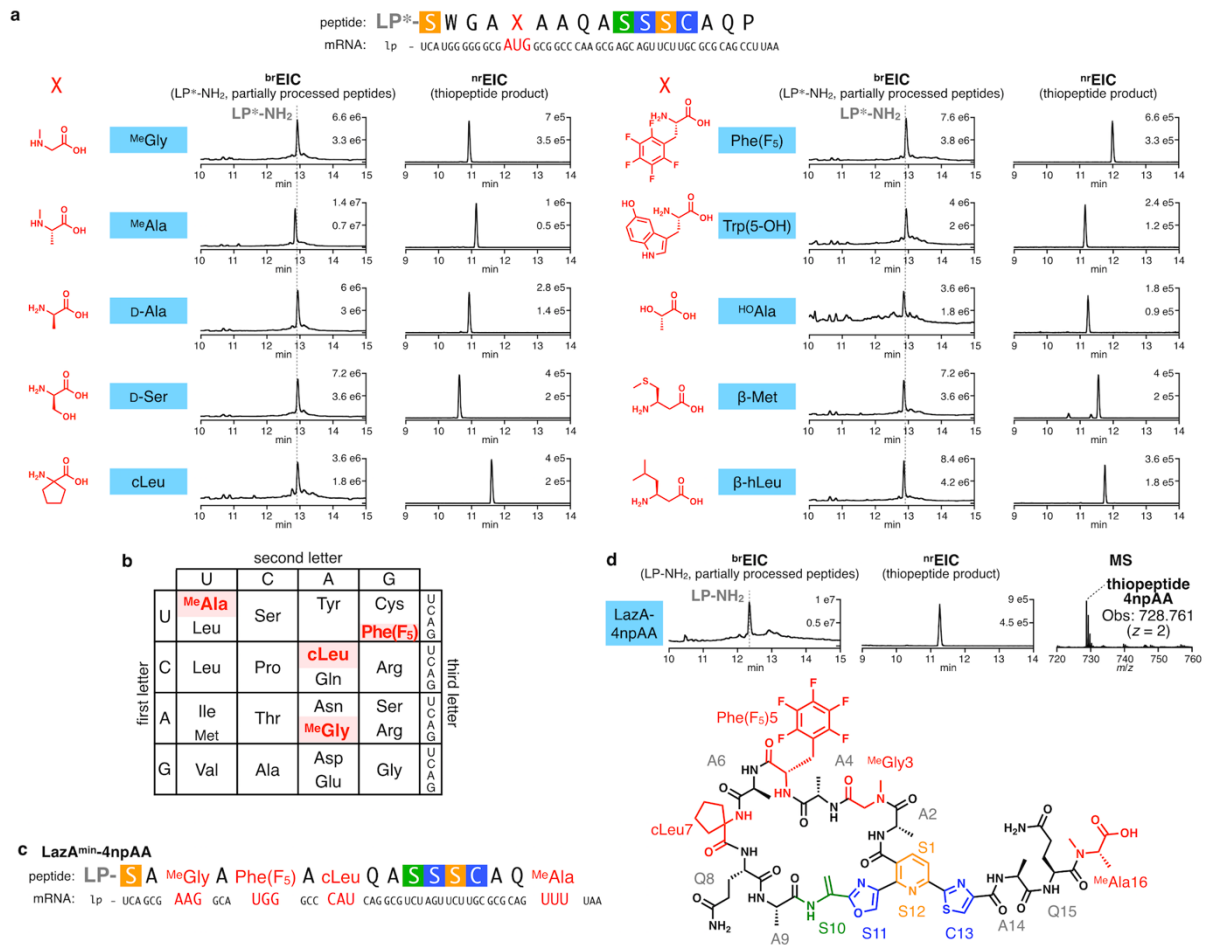

582

583 **Figure 5.** Synthesis of hybrid thiopeptides by genetic code reprogramming with the FIT-Laz system.

584 **(a)** Incorporation of a single npAA in a permissible position 5 of LazA<sup>min</sup> using the Met AUG codon.

585 LazA<sup>min</sup> mutants accessed with *in vitro* genetic code reprogramming were treated with the full enzyme

586 set and the reaction outcomes were analyzed by LC-MS. Displayed are LC-MS chromatograms (<sup>br</sup>EIC

587 chromatograms on the left showing partially processed linear peptides and LP\*-NH<sub>2</sub> after enzymatic

588 treatment, and <sup>nr</sup>EIC chromatograms on the right for expected thiopeptides generated at *m/z* 0.10

589 tolerance window). LP\* stands for LazA LP sequence where formyl-Met is replaced with *N*-

590 biotinylated-Phe (see S.I. 2.8 for details). **(b)** Reprogrammed genetic code utilized for the synthesis of

591 a pseudo-natural lactazole containing 4 npAAs, and **(c)** its mRNA sequence. **(d)** LC-MS chromatograms

592 as in (a) for the enzymatic processing of the LazA<sup>min</sup> variant from (c), and the chemical structure of the

593 resulting thiopeptide. Taken together, these data suggest that diverse hybrid pseudo-natural thiopeptides

594 are accessible with the FIT-Laz system.

595



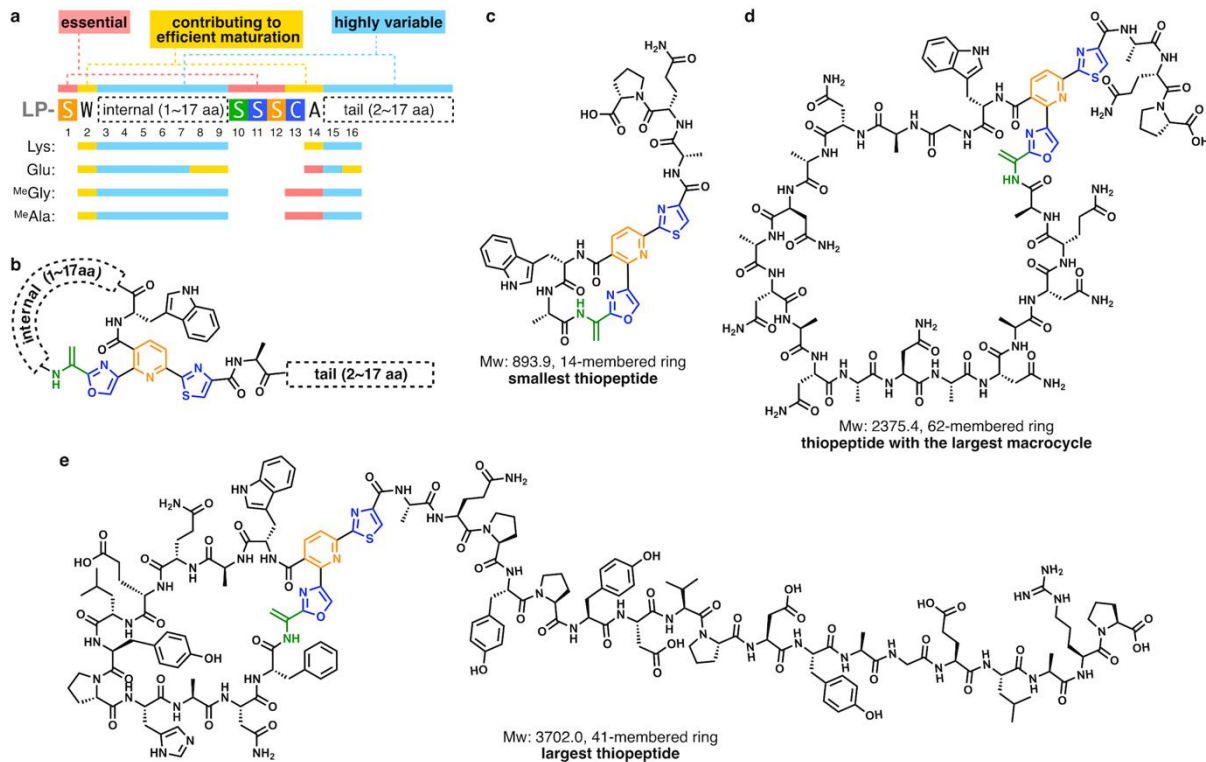

596

597

598

599

600

601

602

**Figure 6.** The summary of the work. **(a)** Primary sequence representation of the minimal lactazole scaffold with the outcomes of the Lys, Glu<sup>MeGly</sup> and <sup>MeAla</sup> scanning experiments mapped to the resulting consensus sequence. **(b)** Chemical structure representation of the minimal lactazole scaffold. **(c) – (e)** Structural diversity of thiopeptides accessible with the FIT-Laz system. Displayed are chemical structures of the smallest artificial lactazole (c), thiopeptide with the largest macrocycle (d) and the largest construct (e) synthesized in this work.
